# Supplementary material
Source: PubMed Central journal article supplement (PMC8231690)
Supplement: cmr.2020.1541-TableS1.pdf [file cmr.2020.1541-TableS1.pdf]

## Supplementary Data

**Table S1.** The overall and domain specific risk of bias in individual studies. Ordered by overall risk of bias (last column). Note, some studies did not examine prognostic factors, therefore domains 3 and 5 were not completed for these studies.

| Author                   | 1. Population | 2. Attrition | 3. Prognostic Factor | 4. Outcomes | 5. Confounders | 6. Stats | Overall |
|--------------------------|---------------|--------------|----------------------|-------------|----------------|----------|---------|
| Chan et al, 2011         | low           | low          | low                  | low         | low            | low      | low     |
| Bradbury et al, 2007     | low           | low          | low                  | low         | low            | low      | low     |
| Metcalfe et al, 2000     | low           | low          | low                  | low         | low            | low      | low     |
| Lukowsky et al, 2012     | low           | low          | low                  | low         | low            | low      | low     |
| Kessler et al, 2003      | low           | low          | low                  | low         | low            | low      | low     |
| Barrett et al, 1997      | medium        | low          | low                  | low         | low            | low      | low     |
| Foley et al, 2014        | low           | low          | low                  | low         | low            | low      | low     |
| Soucie et al, 1996       | low           | low          | low                  | low         | low            | low      | low     |
| Wolf et al, 2007         | medium        | low          | low                  | low         | low            | low      | low     |
| Robinson et al, 2014     | low           | low          | low                  | low         | low            | low      | low     |
| Khan et al, 1995         | medium        | low          | low                  | low         | low            | low      | low     |
| Yazawa et al, 2016       | low           | low          | low                  | low         | low            | low      | low     |
| Ivory et al, 2017        | low           | low          | low                  | low         | low            | low      | low     |
| Chua et al, 2014         | medium        | low          | low                  | low         | low            | low      | high    |
| McQuillan et al, 2012    | medium        | medium       | medium               | low         | medium         | medium   | high    |
| Arai et al, 2014         | high          | low          | medium               | low         | low            | medium   | high    |
| Tsakiris et al, 1999     | high          | medium       | low                  | medium      | high           | medium   | high    |
| Serafinceanu et al, 2014 | high          | medium       | medium               | low         | high           | medium   | high    |
| Foley et al, 1994        | high          | low          | low                  | low         | medium         | low      | high    |
| De Lima et al, 1998      | high          | low          | low                  | low         | high           | high     | high    |
| Biesenbach et al, 2007   | high          | low          | low                  | low         | high           | low      | high    |
| Couchoud et al, 2009     | high          | low          | low                  | low         | medium         | medium   | high    |
| Roca-Tey et al, 2016     | high          | high         | low                  | high        | low            | low      | high    |
| Fabian et al, 2016       | high          | low          | low                  | high        | low            | low      | high    |
| Rubio et al, 2017        | high          | high         | low                  | low         | low            | low      | high    |
| Zhao et al, 2017         | low           | high         | low                  | low         | low            | high     | high    |
